# Supplementary material
Source: PubMed Central journal article supplement (PMC3890869)
Supplement: 1309475110_sapp.pdf [file 1309475110_sapp.pdf]

# Supplementary Information

A Scan-Statistic Based Analysis of Exome Sequencing

Data Identifies *FAN1* at 15q13.3 as a Susceptibility

Gene for Schizophrenia and Autism

Iuliana Ionita-Laza<sup>1,\*</sup>, Bin Xu<sup>2</sup>, Vlad Makarov<sup>1</sup>, Joseph D. Buxbaum<sup>3</sup>,

J. Louw Roos<sup>4</sup>, Joseph A. Gogos<sup>5,6</sup>, Maria Karayiorgou<sup>2,\*</sup>

<sup>1</sup> Department of Biostatistics, Columbia University, New York, NY USA

<sup>2</sup> Department of Psychiatry, Columbia University, New York, New York, USA

<sup>3</sup> Departments of Psychiatry, Neuroscience and Genetics and Genomic Sciences,

Mount Sinai School of Medicine, New York, NY USA

<sup>4</sup> Weskoppies Hospital, Pretoria RSA

<sup>5</sup> Department of Neuroscience, Columbia University, New York, New York, USA

<sup>6</sup> Department of Physiology & Cellular Biophysics, Columbia University, New York, New York, USA

\* Corresponding authors: ii2135@columbia.edu, mk2758@columbia.edu

# Scan-statistic to identify clusters of rare disease risk variants with a trio design

Let us assume that  $N$  trios with affected offspring have been sequenced in a relatively large region  $G$ , such as a CNV or linkage region, or even a large gene. Furthermore let us assume that there are  $M$  rare variant positions in the region of interest. We define a rare variant as a variant with MAF in parents less than a fixed threshold (e.g. 0.01). At each position  $i$  with  $1 \leq i \leq M$  let  $n_i$  be the number of minor alleles in heterozygous parents, with  $y_i$  of them being transmitted. Then  $y_i$  is Binomial( $n_i, p_i$ ), where  $p_i$  is related to the relative risk at position  $i$  (if there is no association between variant  $i$  and disease  $p_i = 0.5$  according to Mendel's laws; however, the transmission probability in any given region can deviate from 0.5 due, for example, to certain biological mechanisms<sup>1</sup>). In a case-control setting<sup>2</sup>,  $n_i$  is the number of carriers (both cases and controls) of minor allele at position  $i$ , and  $y_i$  is the number of cases among them. Then  $y_i$  is Binomial( $n_i, p_i$ ), where  $p_i$  is related to the relative risk at position  $i$ ; if there is no association between variant  $i$  and disease, then  $p_i$  is simply the proportion of cases in the dataset (e.g. it is 0.5 if the number of cases is the same as the number of controls). Most of the derivations below for the trio design are similar to the case-control setting described in detail in Ionita-Laza et al.<sup>2</sup>.

We are working under the assumption that there is a window  $W_{\text{dis}}$  such that  $p_i = p_{W_{\text{dis}}}$  for  $i \in W_{\text{dis}}$  and  $p_i = p_0$  for  $i \notin W_{\text{dis}}$ .  $W_{\text{dis}}$  is the window that contains a cluster of disease associated variants.

Under the null hypothesis (that disease associated variants do not cluster)  $p_{W_{\text{dis}}} = p_0$ , while the alternative hypothesis is that  $p_{W_{\text{dis}}} > p_0$ . Note that the null hypothesis of no clustering does not necessarily imply that there is no association at any of the variants. For a fixed window size we employ a sliding window approach and calculate a likelihood ratio ( $LR$ ) statistic. To calculate the likelihood ratio statistic we first condition on the window  $W$  and calculate for each window  $W$  of fixed size  $w$  the following  $LR$  score:

$$LR_W = \begin{cases} \left( \frac{\widehat{p}_W}{\widehat{r}_G} \right)^{y_W} \left( \frac{1-\widehat{p}_W}{1-\widehat{r}_G} \right)^{n_W-y_W} \left( \frac{\widehat{q}_W}{\widehat{r}_G} \right)^{y_G-y_W} \left( \frac{1-\widehat{q}_W}{1-\widehat{r}_G} \right)^{n_G-n_W-(y_G-y_W)} & \text{if } \widehat{p}_W > \widehat{q}_W \\ 1 & \text{otherwise} \end{cases}$$

where

$$\begin{aligned} y_W &= \sum_{i \in W} y_i & \text{and} & & y_G &= \sum_{i \in G} y_i \\ n_W &= \sum_{i \in W} n_i & \text{and} & & n_G &= \sum_{i \in G} n_i, \\ \widehat{p}_W &= \frac{y_W}{n_W} & \text{and} & & \widehat{q}_W &= \frac{y_G - y_W}{n_G - n_W}, \quad \widehat{r}_G = \frac{y_G}{n_G}. \end{aligned}$$

Note that  $\widehat{p}_W$  and  $\widehat{q}_W$  are the maximum likelihood estimators (MLEs) under the alternative hypothesis, while  $\widehat{r}_G$  is the MLE under the null hypothesis. A pseudocount of 1 is added when estimating the proportions  $p_W$ ,  $q_W$  and  $r_G$ .

The likelihood ratio statistic for window size  $w$  is then computed as:  $\Lambda_w = \max_{|W|=w} LR_W$ . The window  $W$  with the highest value for the  $LR_W$  is the most likely region to harbor a cluster of disease risk variants.

## Statistical significance

We use permutations to assess the statistical significance of the  $\Lambda_w$  statistic. Since our data consists of trios with affected offspring (i.e. no variation in the offspring phenotype), we can only permute the transmitted and untransmitted haplotypes from the parents. Note that this permutation procedure generates the null hypothesis of no association, i.e.  $p_{W_{\text{dis}}} = p_0 = 0.5$ , which is stronger than the null hypothesis stated above (namely that  $p_{W_{\text{dis}}} = p_0$ ). However, since we are usually concerned with detection of such clusters in large genomic regions (such as CNVs that are several megabases long) where we expect  $p_0 \approx 0.5$ , this permutation procedure is approximately correct, as we also show below using simulations.

## Simulation Results

### Type 1 Error

**No Association** We first simulate trios assuming there is no association (hence no clustering) at any of the variants, using the simulation software COSI<sup>3</sup>. We simulate  $n \in \{100, 300, 500\}$  trios and sequence data in a  $\{50\text{kb}, 100\text{kb}\}$  genetic region. We use a threshold of 0.01 or 0.05 for the rare variants to be included in the analyses. We use a sliding window size  $w$  of  $\{10\text{kb}, 20\text{kb}, 30\text{kb}\}$ . We calculate the p value for the entire region (hence adjusted for the multiple testing in the sliding window procedure), and results are shown in Table S11 for  $\alpha = \{0.05, 0.01, 0.001\}$ . As shown, the empirical Type 1 error is well maintained at the specified significance levels.

**Association, but no clustering** We also simulate data assuming there is disease association with variants in the region, but that the associated variants are distributed throughout the region (do not cluster in any particular window). This simulation is meant to illustrate that even if there is disease association with some variants in the region, in the absence of clustering, the proposed test does not have good power to detect such a scenario. We show results in Figure S5. As shown, for a large genomic region (e.g. 100 kb or larger), the power is essentially the same as the Type 1 error. This agrees well with the theoretical expectation, namely for a large region we expect  $p_0$  to be  $\approx 0.5$ . However, for smaller regions (e.g. 50 kb or so) there may be increased power to identify “clusters”, even if no intentional cluster has been simulated. Even though, the power when there is a true cluster is much higher than when there is no or only weak clustering.

### **Power and precision to identify clusters in the data**

To evaluate the power of the approach we assume the entire region is between 500 kb and 3 Mb. We build our simulations on real exome-sequencing data for 231 SCZ trios. First we randomly select 1000 genetic regions for each length category,  $L = \{500 \text{ Kb}, 1.5 \text{ Mb}, 3 \text{ Mb}\}$ , such that each region contains at least one gene with length between 30 and 60 kb, and such that the gene contains a minimum of 50 variants. From each region we select such a gene as the designated disease gene in the region, and assume it contains all the disease mutations. The number of disease mutations was taken to be  $n_{dsv} = 0.1 \times$  the number of trios (if each disease mutation is unique to a trio, this corresponds to having 10% of trios as being carriers of disease mutation).

In a first disease model, we assume each disease mutation is unique to a trio and has been transmitted from one of the parents to the offspring. We call this model *The Unique Mutation Model*. These mutations are artificially replacing the original sequencing data at  $n_{dsv}$  positions in the designated disease gene. This type of disease model resembles what we have observed in the sequencing data for *FAN1*. In a second disease model, we assume a multiple regression model:

$$\text{logit}[P(Y = 1)] = \alpha_0 + \mathbf{X}'\boldsymbol{\beta},$$

where  $Y$  is the affection status for the child (we only include children with  $Y = 1$ ),  $\mathbf{X}$  is the vector of genotypes at the  $n_{dsv}$  positions; and the effect size at each of the  $n_{dsv}$  disease variants is determined by its MAF:  $\beta = 0.8|\log_{10}(MAF)|$ . We call this model *The Regression Model*. The real sequencing data is replaced by simulated sequencing data for 231 trios (using the software COSI) for these disease variants only. We investigate two cases: (1) strong cluster, where the  $n_{dsv}$  disease variants are consecutive positions, hence they cluster closely together, and (2) weaker cluster, where the  $n_{dsv}$  disease variants are interspersed among non-disease variants in an alternating fashion.

We estimate power at the  $\alpha = 0.05$  level based on the 1000 genetic regions of a given length. For the cluster test we evaluate the power to identify a significant cluster anywhere in the larger genetic region of length  $L$ . We also estimate the overlap between the true (simulated) disease cluster and the estimated cluster, using the Jaccard measure of overlap. This measure is between 0 and 1 with 0 meaning no overlap, and 1 meaning complete overlap. We also estimate the power of the conventional sequence-based association tests

for family designs<sup>4</sup>, Burden and SKAT, when applied to the designated disease gene and after Bonferroni adjustment for the total number of genes in the region. Hence both the cluster test and the conventional Burden and SKAT tests are region-based tests, and power is directly comparable across these tests.

We show power results in Figure S6 for a strong cluster. The median size of a strong cluster in our simulations is  $\sim 13 - 14$  kb, and, as expected, power is highest for a 10 kb window size. In the case of strong clustering of rare disease variants, we also show that the cluster test has substantially more power than conventional gene-based tests, such as Burden and SKAT, since the cluster test makes use of the strong clustering of disease mutations in a small genetic region. In fact, for the model with unique disease mutations, the SKAT test has very little power. However, for the regression model, that includes recurrent disease mutations, SKAT's performance improves and its power is closer to that of the Burden test.

The cluster test starts to lose its advantage as the clustering of disease variants becomes weaker. In Figure S7 we show results for the weaker cluster simulation (median size of the cluster is now  $\sim 24 - 26$  kb), and, as can be seen, the power advantage of the cluster test over conventional gene-based tests diminishes. In fact, as the size of the cluster increases, the power of the cluster tests will continue to deteriorate.

We also assess the precision of identifying the true simulated cluster. In Tables S12 and S13 we report the Jacard measure of overlap (size of intersection divided by size of union for two intervals). As expected, the highest overlap is achieved when the scanning window size  $w$  is close to the true size of the underlying cluster.

## Parent-of-origin effect

We have also performed a parent-of-origin effect analysis. In particular, we restricted analysis to transmissions from heterozygous mothers and from heterozygous fathers, and performed Burden and SKAT tests on these data. Since the variants considered are rare ( $MAF < 0.05$ ), there is little chance for both parents to be heterozygous in the same family (to be sure, we exclude such trios, if they exist, from the analyses). Therefore, inferring the parent-of-origin for each variant is straightforward.

## Mendelian inheritance

To ensure that only high quality variants are included in the analyses, we have removed variants with mendel error rate greater than 0.01. The mendel error rate for a variant is calculated as the total number of mendel errors divided by the number of trios. For all the remaining mendel errors, the genotypes in those implicated trios are set to 0. For the 15q13.3 region, we have looked at the mendel error rates for variants within any of the 7 known genes, plus the 20 kb window within *FAN1* (Figure S4). As shown, only two of 48 variants within *FAN1* have a small, non-zero mendel error.

## Network analysis

We have investigated whether other genes that interact with *FAN1*, directly or indirectly, are collectively enriched in rare loss-of-function (LOF) variants in SCZ probands. First, we con-



structed a gene-gene interaction network using the STRING database (<http://www.string-db.org>). We started with *FAN1* as a seed gene, and then used the STRING database to identify as many genes which are directly or indirectly connected to *FAN1* with a high confidence score (greater than 0.9). This way we have identified a network with 27 genes. Among these genes, there are 10 rare LOF variants being transmitted from parents to SCZ probands (Table S10). The total number of rare LOFs that are transmitted to SCZ probands is 3523. To assess the statistical significance, we have performed a simple re-sampling procedure by randomly sampling 27 genes out of 20,000 and counting the number of LOFs observed in such a random set. Based on 100,000 random draws we obtain an empirical p value of 0.037.

## References

- [1] Zoellner S, Wen X, Hanchard NA, Herbert MA, Ober C, Pritchard JK (2004) Evidence for extensive transmission distortion in the human genome. *Am J Hum Genet* 74: 62–72.
- [2] Ionita-Laza I, Makarov V; ARRA Autism Sequencing Consortium, Buxbaum JD (2012b) Scan-statistic approach identifies clusters of rare disease variants in LRP2, a gene linked and associated with autism spectrum disorders, in three datasets. *Am J Hum Genet* 90: 1002–1013.
- [3] Schaffner SF et al. (2005) Calibrating a coalescent simulation of human genome sequence variation. *Genome Res* 15: 1576–1583.
- [4] Ionita-Laza I, Lee S, Makarov V, Buxbaum JD, Lin X (2013) Family-based association tests for sequence data, and comparisons with population-based association tests. *Eur J Hum Genet* in press
- [5] Vacic V et al. (2011) Duplications of the neuropeptide receptor gene VIPR2 confer significant risk for schizophrenia. *Nature* 471: 499-503.
- [6] Kirov G et al. (2012) De novo CNV analysis implicates specific abnormalities of post-synaptic signalling complexes in the pathogenesis of schizophrenia. *Mol Psychiatry* 17: 142-153.
- [7] Xu B et al. (2012) De novo gene mutations highlight patterns of genetic and neural complexity in schizophrenia. *Nat Genet* 44: 1365-1369.

- [8] Bassett AS et al. (2010) Clinically detectable copy number variations in a Canadian catchment population of schizophrenia. *J Psychiatr Res* 44: 1005-1009.
- [9] Kirov G et al. (2008) Comparative genome hybridization suggests a role for NRXN1 and APBA2 in schizophrenia. *Hum Mol Genet* 17: 458-465.
- [10] Kirov G et al. (2012) De novo CNV analysis implicates specific abnormalities of post-synaptic signalling complexes in the pathogenesis of schizophrenia. *Mol Psychiatry* 17: 142-153.
- [11] Malhotra D et al. (2011) High frequencies of de novo CNVs in bipolar disorder and schizophrenia. *Neuron* 72: 951-963.
- [12] Xu B et al. (2008) Strong association of de novo copy number mutations with sporadic schizophrenia. *Nat Genet* 40: 880-885.

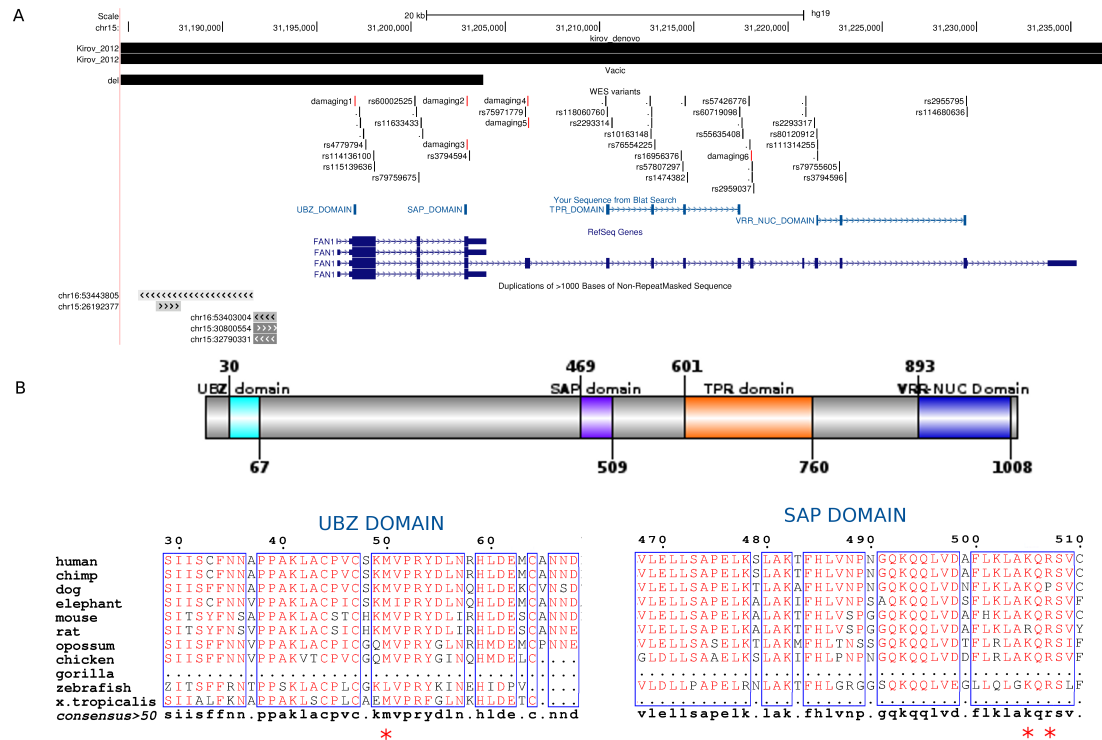

Figure S1: Variants within the *FAN1* region. A. These variants were identified in SCZ datasets. Track1: the de novo CNVs cover the *FAN1* gene in Vacic et al.<sup>5</sup> and Kirov et al.<sup>6</sup>. Track2: Rare variants (MAF < 0.01) identified in our SCZ whole exome sequencing data<sup>7</sup>. Six damaging variants (predicted by the SIFT software) are indicated by red bars. Track3: the genomic coverage of predicted functional domains in the *FAN1* protein. Track4: The Refseq gene annotation of all *FAN1* isoforms. Track5: The segmental duplications surrounding the *FAN1* gene. B. The variants that might affect the functional domains of the *FAN1* protein. Upper panel: There are four predicted functional domains in the *FAN1* protein: UBZ domain, SAP domain, TPR domain and VRR-NUC Domain. Lower panel: The evolutionary conservation of UBZ and SAP domains, which are affected by three damaging variants (red asterisk).

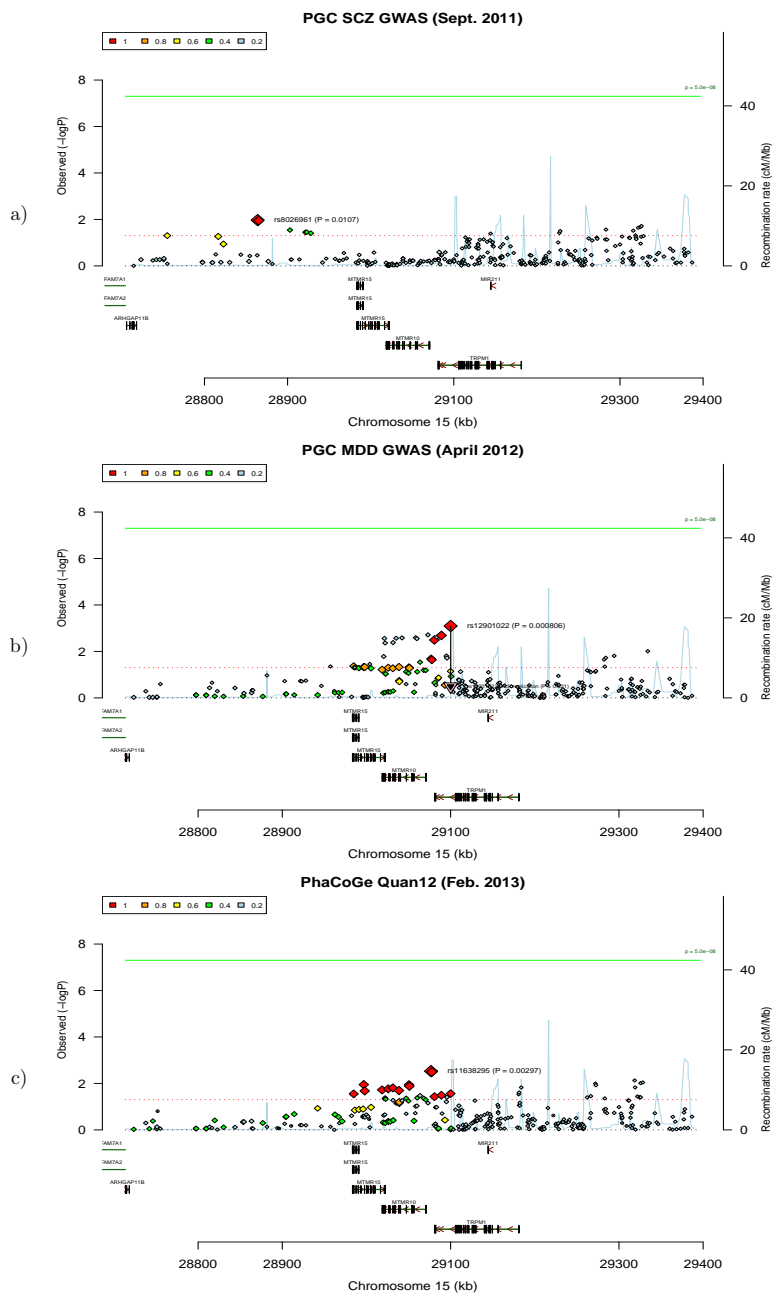

Figure S2: GWAS results in a 400 kb region including *FAN1*/*MTMR15* for (a) SCZ, (b) Major Depressive Disorder, (c) Antidepressant therapy.

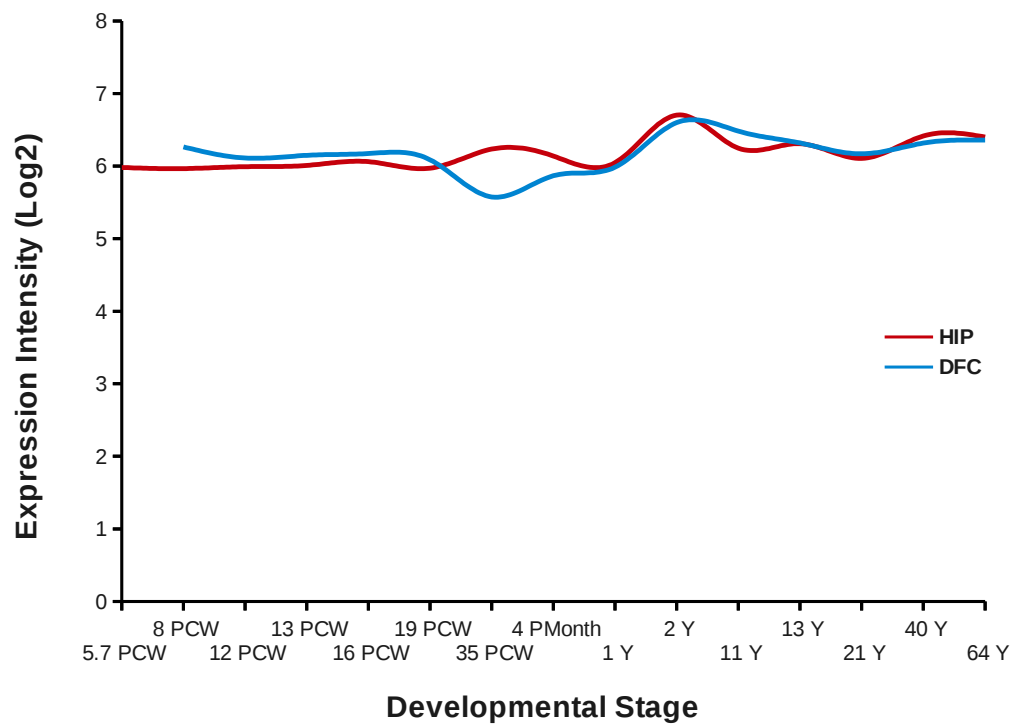

Figure S3: The expression pattern of FAN1 mRNA in Hippocampus (HIP, red line) and dorsal frontal cortex (DFC, blue line) regions along human brain development. PCW = Postconceptual weeks; PMonths = Postnatal months; Y = Year.

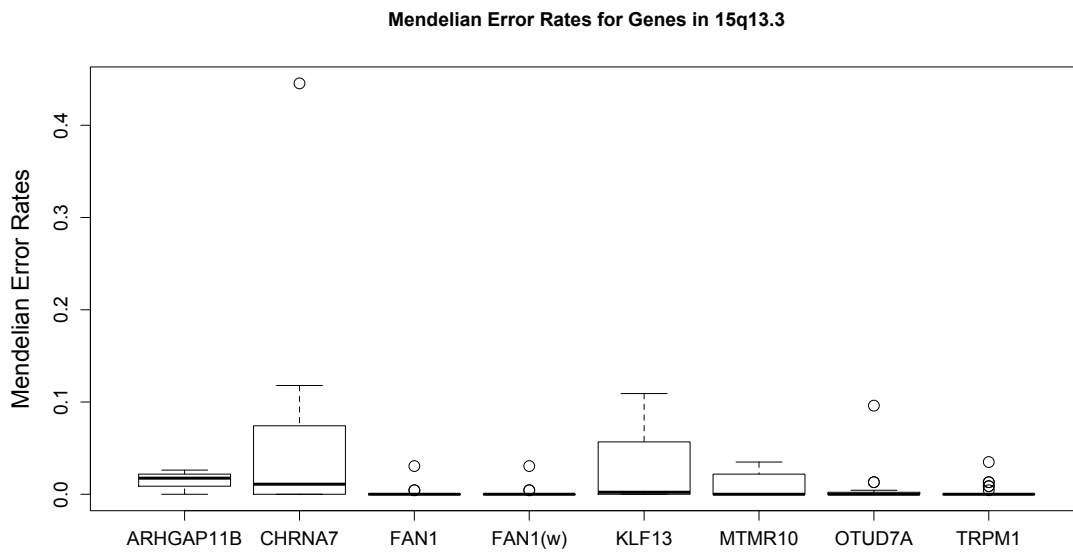

Figure S4: Mendelian error rates for the genes in 15q13.3 CNV. FAN1(w) refers to the 20 kb window with maximum score in the scan statistic procedure. The Mendelian error rate for each variant was calculated as the total number of mendel errors divided by the number of trios.

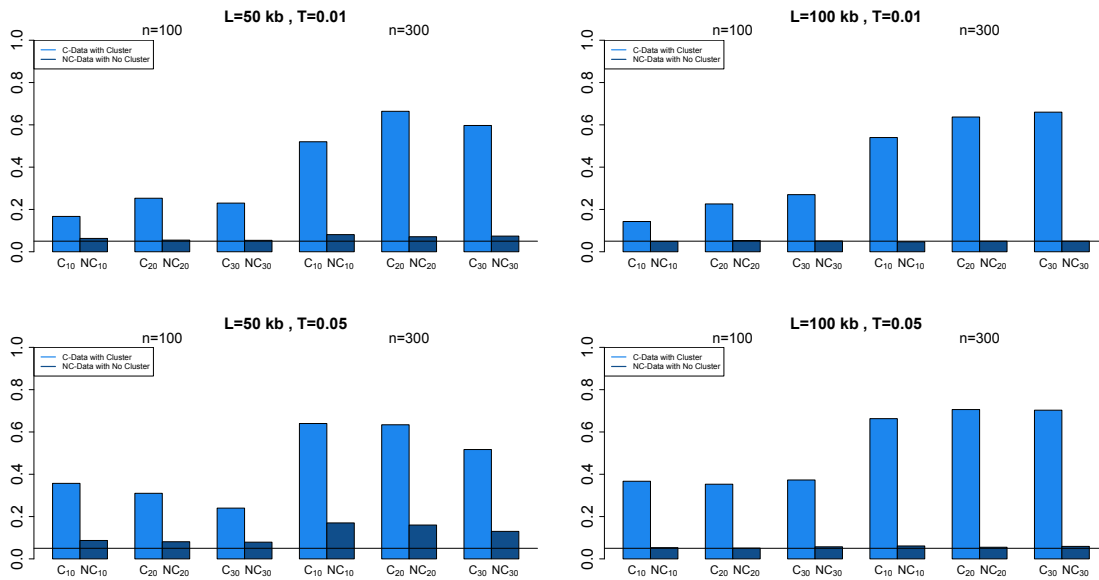

Figure S5: Power of the cluster test on simulated data with clustering (C) and without clustering (NC) of disease risk variants. A scanning window size  $w$  of {10kb, 20kb, 30kb} is used. The horizontal line corresponds to the 0.05 level.  $L$  is the length of the region, and variants with frequency less than  $T$  are included in the study.  $n = 100 - 300$  trios are simulated.



### Power Cluster vs. Burden/SKAT tests (Strong Cluster)

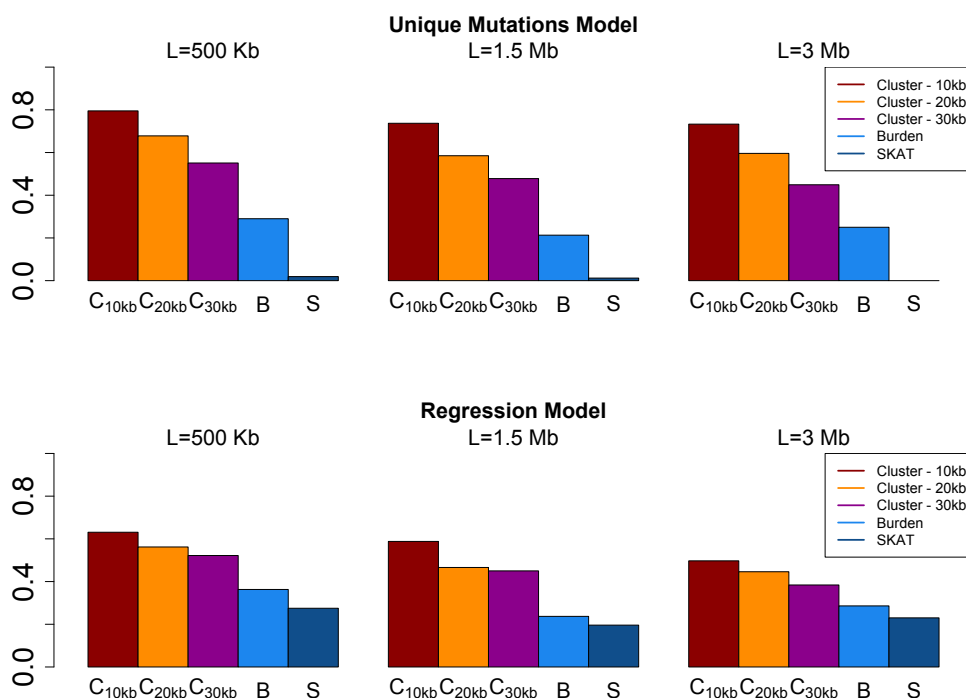

Figure S6: Strong Cluster. Power cluster tests vs. conventional gene-based tests, i.e. Burden and SKAT tests. Two different models have been considered. In the first model, the Unique Mutation Model, 10% of trios ( $n = 231$ ) carry each a unique disease variant that is transmitted from parent to offspring. In the second model, the disease variants are also rare ( $MAF \leq 0.01$ ), but a multiple regression model is used to generate the phenotype, with the effect size at a disease variant given by  $\beta = 0.8|\log_{10}(MAF)|$ . A strong clustering of disease variants is assumed (see text for details).

### Power Cluster vs. Burden/SKAT tests (Weaker Cluster)

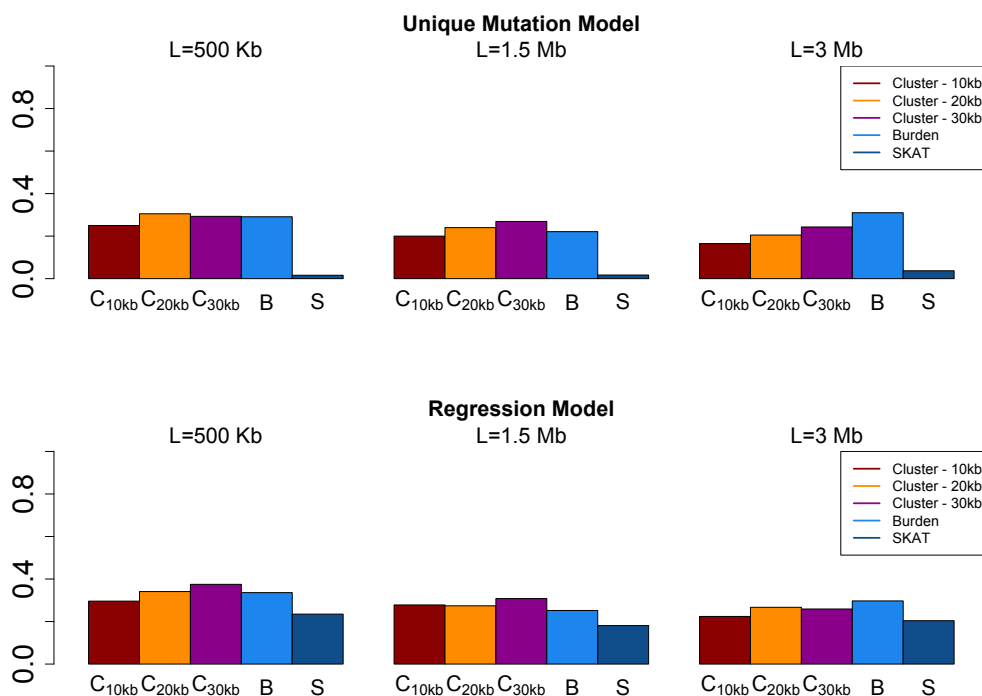

Figure S7: Weaker Cluster. Power cluster tests vs. conventional gene-based tests, i.e. Burden and SKAT tests. Two different models have been considered. In the first model, the Unique Mutation Model, 10% of trios ( $n = 231$ ) carry each a unique disease variant that is transmitted from parent to offspring. In the second model, the disease variants are also rare ( $MAF \leq 0.01$ ), but a multiple regression model is used to generate the phenotype, with the effect size at a disease variant given by  $\beta = 0.8|\log_{10}(MAF)|$ . A weaker clustering of disease variants is assumed (see text for details).

Table S1: De novo CNV regions in SCZ literature (hg19).

| Chr | Start     | End       | Reference                           |
|-----|-----------|-----------|-------------------------------------|
| 1   | 765219    | 1276858   | Malhotra et al. Neuron 2011         |
| 1   | 40290696  | 40904796  | Xu et al. Nat Genet 2008            |
| 1   | 145390102 | 145792052 | Kirov et al. Mol Psych 2012         |
| 1   | 237408657 | 237573021 | Kirov et al. Mol Psych 2012         |
| 2   | 133787950 | 134163308 | Kirov et al. Mol Psych 2012         |
| 3   | 28302788  | 28467088  | Xu et al. Nat Genet 2008            |
| 3   | 107847902 | 108716025 | Kirov et al. Mol Psych 2012         |
| 3   | 134282853 | 136305453 | Xu et al. Nat Genet 2008            |
| 3   | 195701151 | 197340834 | Kirov et al. Mol Psych 2012         |
| 4   | 70900915  | 70934964  | Kirov et al. Mol Psych 2012         |
| 4   | 79725588  | 79862955  | Kirov et al. Mol Psych 2012         |
| 4   | 115406126 | 115518189 | Malhotra et al. Neuron 2011         |
| 4   | 187655318 | 190915739 | Malhotra et al. Neuron 2011         |
| 5   | 130835940 | 130950240 | Xu et al. Nat Genet 2008            |
| 6   | 17467091  | 17831391  | Xu et al. Nat Genet 2008            |
| 6   | 17531915  | 17880119  | Malhotra et al. Neuron 2011         |
| 6   | 68619234  | 68704380  | Kirov et al. Mol Psych 2012         |
| 7   | 38294089  | 38340662  | Kirov et al. Mol Psych 2012         |
| 7   | 127488559 | 127660731 | Kirov et al. Mol Psych 2012         |
| 7   | 152011032 | 159127480 | Malhotra et al. Neuron 2011         |
| 8   | 4134560   | 4312402   | Kirov et al. Mol Psych 2012         |
| 8   | 10029452  | 10118004  | Kirov et al. Mol Psych 2012         |
| 8   | 24972985  | 24990883  | Malhotra et al. Neuron 2011         |
| 8   | 113733756 | 113774509 | Malhotra et al. Neuron 2011         |
| 9   | 16320745  | 16337782  | Kirov et al. Mol Psych 2012         |
| 9   | 111819310 | 112393378 | Kirov et al. Mol Psych 2012         |
| 9   | 140642331 | 140677602 | Kirov et al. Mol Psych 2012         |
| 9   | 140649743 | 140672281 | Kirov et al. Mol Psych 2012         |
| 11  | 83795102  | 84165325  | Kirov et al. Mol Psych 2012         |
| 11  | 84328458  | 84548416  | Kirov et al. Mol Psych 2012         |
| 12  | 113239412 | 113291662 | Kirov et al. Mol Psych 2012         |
| 12  | 118581131 | 118648415 | Malhotra et al. Neuron 2011         |
| 12  | 120205095 | 120229895 | Xu et al. Nat Genet 2008            |
| 12  | 131822084 | 132093577 | Kirov et al. Mol Psych 2012         |
| 13  | 41421620  | 42284276  | Kirov et al. Mol Psych 2012         |
| 14  | 35395020  | 35557969  | Kirov et al. Mol Psych 2012         |
| 14  | 94761421  | 97565021  | Xu et al. Nat Genet 2008            |
| 15  | 22673387  | 23300761  | Kirov et al. Mol Psych 2012         |
| 15  | 22751082  | 23487534  | Kirov et al. Mol Psych 2012         |
| 15  | 29212708  | 30612708  | Kirov et al. Hum Mol Genet 2008     |
| 15  | 30920612  | 32539525  | Kirov et al. Mol Psych 2012         |
| 16  | 6948175   | 6978875   | Xu et al. Nat Genet 2008            |
| 16  | 29580611  | 30191895  | Kirov et al. Mol Psych 2012         |
| 18  | 3525935   | 4342609   | Kirov et al. Mol Psych 2012         |
| 19  | 2838838   | 12423090  | Bassett et al. J Psychiatr Res 2010 |
| 19  | 37322979  | 37501479  | Xu et al. Nat Genet 2008            |
| 20  | 14746326  | 14915051  | Kirov et al. Mol Psych 2012         |
| 21  | 23776379  | 23856373  | Kirov et al. Mol Psych 2012         |
| 22  | 20489860  | 21676782  | Malhotra et al. Neuron 2011         |

Table S2: Top 3 CNV regions significant at the 0.05 level. Only the first CNV, on chromosome 15q13.3, is significant after adjustment for multiple testing. Results are shown for the combined SA and US datasets, with nonsynonymous (NS) variants. ‘Window’ corresponds to the 20 kb window with the highest score in the scan statistic procedure.

| Dataset        | $n$ | Variants | CNV      | Length | P      | Window (hg19)           | Gene          |
|----------------|-----|----------|----------|--------|--------|-------------------------|---------------|
| SA+US<br>(SCZ) | 231 | NS       | 15q13.3  | 1.6Mb  | 0.0012 | 31.197.976-31.217.976   | <i>FAN1</i>   |
|                |     |          | 22q11.21 | 2.6Mb  | 0.051  | 20.302.276-20.322.276   | <i>DGCR6L</i> |
|                |     |          | 3q29     | 1.6Mb  | 0.054  | 196.746.595-196.766.595 | <i>MFI2</i>   |

Table S3: Conventional gene-based tests (Burden and SKAT) results for *FAN1* in the SCZ study. All rare variants (All) or only the rare nonsynonymous ones (NS) were analyzed. ‘Window’ corresponds to the 20 kb window with the highest score in the scan statistic procedure. The p values in the table are gene or window level p values, hence they are unadjusted for multiple genes or windows within a CNV region.

| Disease | Dataset | $n$ | Variants   | Burden | SKAT  |
|---------|---------|-----|------------|--------|-------|
| SCZ     | SA      | 146 | All        | 0.21   | 0.58  |
|         |         |     | All-window | 0.54   | 0.65  |
|         |         |     | NS         | 0.038  | 0.07  |
|         |         |     | NS-window  | 0.064  | 0.14  |
| SCZ     | US      | 85  | All        | 0.32   | 0.83  |
|         |         |     | All-window | 0.12   | 0.53  |
|         |         |     | NS         | 0.34   | 0.47  |
|         |         |     | NS-window  | 0.012  | 0.15  |
| SCZ     | SA+US   | 231 | All        | 0.17   | 0.68  |
|         |         |     | All-window | 0.06   | 0.39  |
|         |         |     | NS         | 0.025  | 0.14  |
|         |         |     | NS-window  | 0.001  | 0.022 |

Table S4: Conventional gene-based tests (Burden and SKAT for family designs) results for genes within 15q13.3, when only rare and nonsynonymous variants are being considered in the SCZ study.  $FAN1(w)$  refers to the 20 kb window with the highest score in the scan statistic procedure. For three of the genes there were no rare nonsynonymous variants that passed our stringent filtering criteria.

| Dataset        | $n$ | Variants | Gene        | Burden | SKAT  |
|----------------|-----|----------|-------------|--------|-------|
| SA+US<br>(SCZ) | 231 | NS       | $FAN1(w)$   | 0.001  | 0.022 |
|                |     |          | $FAN1$      | 0.025  | 0.14  |
|                |     |          | $OTUD7A$    | 0.24   | 0.08  |
|                |     |          | $TRPM1$     | 0.74   | 0.040 |
|                |     |          | $MTMR10$    | 0.75   | 0.69  |
|                |     |          | $ARHGAP11B$ | NA     | NA    |
|                |     |          | $CHRNA7$    | NA     | NA    |
|                |     |          | $KLF13$     | NA     | NA    |

Table S5: *FAN1* Variants in SCZ study. For each rare variant we report the counts of transmitted (T) and untransmitted (U) minor allele from heterozygous parents to SCZ children. Counts are calculated for mothers (Mo) and fathers (Fa) combined, and separately for mothers and fathers. The functional class for each variant is also reported, with ‘.’ representing non-coding variants. The variants between the double lines reside within the 20 kb window with highest score in the scan statistic procedure.

| Chr   | Position (hg19) | funcClass | Mo+Fa |    | Mo |    | Fa |    |
|-------|-----------------|-----------|-------|----|----|----|----|----|
|       |                 |           | T     | U  | T  | U  | T  | U  |
| 15    | 31197015        | missense  | 1     | 1  | 0  | 0  | 1  | 1  |
| 15    | 31197264        | missense  | 0     | 1  | 0  | 0  | 0  | 1  |
| 15    | 31197300        | missense  | 0     | 1  | 0  | 0  | 0  | 1  |
| 15    | 31197469        | silent    | 0     | 2  | 0  | 1  | 0  | 1  |
| <hr/> |                 |           |       |    |    |    |    |    |
| 15    | 31198043        | missense  | 1     | 0  | 0  | 0  | 1  | 0  |
| 15    | 31200173        | .         | 1     | 0  | 1  | 0  | 0  | 0  |
| 15    | 31200281        | .         | 1     | 0  | 1  | 0  | 0  | 0  |
| 15    | 31200396        | missense  | 1     | 0  | 1  | 0  | 0  | 0  |
| 15    | 31200602        | .         | 1     | 2  | 0  | 0  | 1  | 2  |
| 15    | 31202955        | missense  | 1     | 0  | 1  | 0  | 0  | 0  |
| 15    | 31202961        | missense  | 4     | 0  | 4  | 0  | 0  | 0  |
| 15    | 31206047        | .         | 2     | 0  | 1  | 0  | 1  | 0  |
| 15    | 31206189        | missense  | 1     | 0  | 1  | 0  | 0  | 0  |
| 15    | 31206216        | missense  | 1     | 0  | 0  | 0  | 1  | 0  |
| 15    | 31210319        | .         | 2     | 0  | 1  | 0  | 1  | 0  |
| 15    | 31212667        | .         | 1     | 0  | 0  | 0  | 1  | 0  |
| 15    | 31212734        | .         | 1     | 0  | 1  | 0  | 0  | 0  |
| 15    | 31214309        | .         | 1     | 0  | 1  | 0  | 0  | 0  |
| 15    | 31214385        | .         | 3     | 1  | 2  | 1  | 1  | 0  |
| 15    | 31214503        | silent    | 1     | 0  | 0  | 0  | 1  | 0  |
| 15    | 31217428        | silent    | 3     | 1  | 2  | 1  | 1  | 0  |
| 15    | 31217553        | .         | 2     | 0  | 1  | 0  | 1  | 0  |
| <hr/> |                 |           |       |    |    |    |    |    |
| 15    | 31217593        | .         | 3     | 4  | 2  | 1  | 1  | 3  |
| 15    | 31217935        | .         | 0     | 4  | 0  | 2  | 0  | 2  |
| 15    | 31218035        | missense  | 1     | 1  | 1  | 0  | 0  | 1  |
| 15    | 31218072        | silent    | 4     | 3  | 2  | 3  | 2  | 0  |
| 15    | 31218081        | silent    | 1     | 1  | 1  | 0  | 0  | 1  |
| 15    | 31220931        | .         | 0     | 1  | 0  | 1  | 0  | 0  |
| 15    | 31221358        | .         | 4     | 3  | 3  | 2  | 1  | 1  |
| 15    | 31221528        | silent    | 1     | 1  | 0  | 1  | 1  | 0  |
| 15    | 31221552        | silent    | 0     | 1  | 0  | 1  | 0  | 0  |
| 15    | 31222702        | .         | 1     | 1  | 1  | 1  | 0  | 0  |
| 15    | 31229463        | .         | 1     | 1  | 0  | 0  | 1  | 1  |
| <hr/> |                 |           |       |    |    |    |    |    |
| Total |                 |           | 45    | 30 | 28 | 15 | 17 | 15 |

Table S6: *FAN1* Variants in SCZ study. For each rare variant we report the counts of transmitted (T) and untransmitted (U) minor allele from heterozygous parents to SCZ children. SIFT score predicts tolerated and deleterious substitutions at each position. GERP<sub>RS</sub> measures constraint intensity (in terms of rejected substitutions). The functional class for each variant is also reported, with ‘.’ representing non-coding variants. The variants between the double lines reside within the 20 kb window with highest score in the scan statistic procedure.

| Chr | Position (hg19) | ID          | funcClass | T | U | Prediction | SIFT | GERP <sub>RS</sub> |
|-----|-----------------|-------------|-----------|---|---|------------|------|--------------------|
| 15  | 31197015        | rs148404807 | missense  | 1 | 1 | damaging   | 0.01 | 5.15               |
| 15  | 31197264        | .           | missense  | 0 | 1 | .          | 0.08 | -4.32              |
| 15  | 31197300        | rs146408181 | missense  | 0 | 1 | .          | 0.05 | -7.76              |
| 15  | 31197469        | rs142084532 | silent    | 0 | 2 | .          | 0.78 | 1.86               |
| 15  | 31198043        | rs115139636 | missense  | 1 | 0 | .          | 0.54 | -3.05              |
| 15  | 31200173        | rs60002525  | .         | 1 | 0 | .          | .    | .                  |
| 15  | 31200281        | .           | .         | 1 | 0 | .          | .    | .                  |
| 15  | 31200396        | rs79759675  | missense  | 1 | 0 | .          | 0.26 | 3.36               |
| 15  | 31200602        | .           | .         | 1 | 2 | .          | .    | .                  |
| 15  | 31202955        | .           | missense  | 1 | 0 | damaging   | 0.01 | -5.43              |
| 15  | 31202961        | rs150393409 | missense  | 4 | 0 | damaging   | 0.04 | 2.62               |
| 15  | 31206047        | rs75971779  | .         | 2 | 0 | .          | .    | .                  |
| 15  | 31206189        | .           | missense  | 1 | 0 | damaging   | 0.01 | 2.86               |
| 15  | 31206216        | .           | missense  | 1 | 0 | damaging   | 0.02 | -0.70              |
| 15  | 31210319        | rs189512431 | .         | 2 | 0 | .          | .    | .                  |
| 15  | 31212667        | .           | .         | 1 | 0 | .          | .    | .                  |
| 15  | 31212734        | .           | .         | 1 | 0 | .          | .    | .                  |
| 15  | 31214309        | rs16956376  | .         | 1 | 0 | .          | .    | .                  |
| 15  | 31214385        | rs57807297  | .         | 3 | 1 | .          | .    | .                  |
| 15  | 31214503        | rs141559766 | silent    | 1 | 0 | .          | .    | .                  |
| 15  | 31217428        | rs60719098  | silent    | 3 | 1 | .          | .    | .                  |
| 15  | 31217553        | .           | .         | 2 | 0 | .          | .    | .                  |
| 15  | 31217593        | rs55635408  | .         | 3 | 4 | .          | .    | .                  |
| 15  | 31217935        | .           | .         | 0 | 4 | .          | .    | .                  |
| 15  | 31218035        | rs145610507 | missense  | 1 | 1 | damaging   | 0    | 5.21               |
| 15  | 31218072        | rs143461130 | silent    | 4 | 3 | .          | 1    | 0.50               |
| 15  | 31218081        | .           | silent    | 1 | 1 | .          | .    | .                  |
| 15  | 31220931        | .           | .         | 0 | 1 | .          | .    | .                  |
| 15  | 31221358        | rs2293317   | .         | 4 | 3 | .          | .    | .                  |
| 15  | 31221528        | rs111314255 | silent    | 1 | 1 | .          | .    | .                  |
| 15  | 31221552        | .           | silent    | 0 | 1 | .          | .    | .                  |
| 15  | 31222702        | rs79755605  | .         | 1 | 1 | .          | .    | .                  |
| 15  | 31229463        | rs114680636 | .         | 1 | 1 | .          | .    | .                  |

Table S7: *FAN1* rare functional variants in SCZ study, and the study ID for each parent that carries such a variant. Variant annotation has been performed using SnpEff and VariantAnnotator.

| Chr | Position (hg19) | SnpEff_Impact | SnpEff_Effect     | Parent ID                                        |
|-----|-----------------|---------------|-------------------|--------------------------------------------------|
| 15  | 31197015        | moderate      | NonSyn_Coding     | {1011MK0042, 1011MK1032}                         |
| 15  | 31197264        | moderate      | NonSyn_Coding     | {1011MK1183}                                     |
| 15  | 31197300        | moderate      | NonSyn_Coding     | {1011MK0045}                                     |
| 15  | 31198043        | moderate      | NonSyn_Coding     | {1011MK1195}                                     |
| 15  | 31200396        | moderate      | NonSyn_Coding     | {1011MK1218}                                     |
| 15  | 31202955        | moderate      | NonSyn_Coding     | {1011MK0116}                                     |
| 15  | 31202961        | moderate      | NonSyn_Coding     | {1011MK0719, 1011MK0875, 1011MK0980, 1011MK1227} |
| 15  | 31206189        | moderate      | NonSyn_Coding     | {1011MK1137}                                     |
| 15  | 31206216        | moderate      | NonSyn_Coding     | {1011MK1207}                                     |
| 15  | 31218035        | moderate      | NonSyn_Coding     | {1011MK0003, 1011MK0593}                         |
| 15  | 31229463        | high          | Splice_Site_Donor | {1011MK0294, 1011MK0888}                         |

Table S8: Co-morbid diagnosis (DX) for individuals with nonsynonymous rare variant in the 20 kb window in the SCZ study. ‘PofO’ refers to the parent-of-origin for the variant (from a heterozygous parent).

| Sample ID  | Sample | DX                      | PofO | Co-morbid DX                 |
|------------|--------|-------------------------|------|------------------------------|
| 1011MK0115 | SA     | SCZ                     | Mo   | DEPR                         |
| 1011MK0718 | SA     | SCZ                     | Mo   | DYSTHYMIA                    |
| 1011MK0874 | SA     | SCZ                     | Mo   | MDD                          |
| 1011MK0979 | US     | SCZAFF, BP type         | Mo   |                              |
| 1011MK1136 | US     | SCZAFF, Depressive type | Mo   | Depression-frequent episodes |
| 1011MK1193 | US     | SCZAFF, BP type         | Fa   |                              |
| 1011MK1205 | US     | SCZ                     | Fa   | Cocaine dep                  |
| 1011MK1217 | US     | SCZ                     | Mo   | Depressive episode           |
| 1011MK1226 | US     | SCZAFF, BP type         | Mo   | Severe depressive episode    |



Table S9: *FAN1* Variants in ASD study. For each rare variant we report the minor allele frequency in ASD cases ( $f_A$ ) and controls ( $f_U$ ). SIFT score predicts tolerated and deleterious substitutions at each position. GERP<sub>RS</sub> measures constraint intensity (in terms of rejected substitutions). The functional class for each variant is also reported, with ‘.’ representing non-coding variants. The variants between the double lines reside within the 20 kb window with highest score in the scan statistic procedure.

| Chr | Position (hg19) | ID          | funcClass | $f_A$ | $f_U$ | Prediction | SIFT | GERP <sub>RS</sub> |
|-----|-----------------|-------------|-----------|-------|-------|------------|------|--------------------|
| 15  | 31196867        | rs139312614 | missense  | 0     | 0.001 |            | 0.21 | 4                  |
| 15  | 31196944        | .           | silent    | 0.001 | 0     |            | .    | .                  |
| 15  | 31197015        | rs148404807 | missense  | 0.002 | 0.003 | damaging   | 0.01 | 5.15               |
| 15  | 31197040        | rs143965941 | silent    | 0.001 | 0.001 |            | .    | .                  |
| 15  | 31197300        | rs146408181 | missense  | 0.003 | 0.003 |            | 0.31 | -7.76              |
| 15  | 31197363        | rs146422014 | missense  | 0.001 | 0.001 |            | 0.13 | 5.22               |
| 15  | 31197469        | rs142084532 | silent    | 0     | 0.001 |            | 0.78 | 1.86               |
| 15  | 31197542        | .           | missense  | 0.001 | 0     |            | 0.39 | -3.38              |
| 15  | 31197584        | rs150748572 | missense  | 0.002 | 0.004 |            | 0.27 | 4.15               |
| 15  | 31197648        | rs137920161 | missense  | 0.001 | 0     |            | 0.5  | 2.12               |
| 15  | 31197649        | rs142437586 | silent    | 0     | 0.001 |            | .    | .                  |
| 15  | 31197752        | .           | missense  | 0.001 | 0     |            | 0.68 | -8.45              |
| 15  | 31197995        | rs151322829 | missense  | 0.004 | 0.004 |            | 0.14 | -1.21              |
| 15  | 31198043        | rs115139636 | missense  | 0     | 0.001 |            | 0.68 | -3.05              |
| 15  | 31198044        | rs140632948 | missense  | 0     | 0.001 |            | 0.4  | 2.55               |
| 15  | 31198050        | rs201153099 | missense  | 0.003 | 0     | damaging   | 0.01 | 5.99               |
| 15  | 31198060        | rs141494062 | silent    | 0     | 0.001 |            | 0.25 | -8.2               |
| 15  | 31200396        | rs79759675  | missense  | 0.001 | 0.001 |            | 0.65 | 3.36               |
| 15  | 31202787        | rs187650218 | .         | 0     | 0.001 |            | .    | .                  |
| 15  | 31202794        | .           | .         | 0.004 | 0     |            | .    | .                  |
| 15  | 31202795        | .           | .         | 0.005 | 0     |            | .    | .                  |
| 15  | 31202796        | .           | .         | 0.001 | 0.009 |            | .    | .                  |
| 15  | 31202961        | rs150393409 | missense  | 0.018 | 0.008 | damaging   | 0.04 | 2.62               |
| 15  | 31206047        | rs75971779  | .         | 0     | 0.003 |            | .    | .                  |
| 15  | 31206052        | .           | .         | 0.001 | 0     |            | .    | .                  |
| 15  | 31210319        | rs189512431 | .         | 0.002 | 0.003 |            | .    | .                  |
| 15  | 31212698        | .           | .         | 0.005 | 0.007 |            | .    | .                  |
| 15  | 31212734        | .           | .         | 0.001 | 0     |            | .    | .                  |
| 15  | 31212744        | rs200971774 | .         | 0.004 | 0.007 |            | .    | .                  |
| 15  | 31212765        | rs144081053 | missense  | 0.001 | 0.001 | damaging   | 0.04 | 5.7                |
| 15  | 31212777        | rs200818425 | missense  | 0.001 | 0     | damaging   | 0.03 | 5.89               |
| 15  | 31214425        | .           | .         | 0.001 | 0     |            | .    | .                  |
| 15  | 31214443        | rs144723412 | silent    | 0.001 | 0.003 |            | .    | .                  |
| 15  | 31214444        | .           | missense  | 0     | 0.001 |            | 0.22 | 4.78               |
| 15  | 31214488        | rs200451712 | silent    | 0     | 0.001 |            | .    | .                  |
| 15  | 31214503        | rs141559766 | silent    | 0.001 | 0.001 |            | .    | .                  |
| 15  | 31217305        | .           | .         | 0.001 | 0     |            | .    | .                  |
| 15  | 31217339        | .           | missense  | 0.001 | 0     | damaging   | 0.03 | 5.58               |
| 15  | 31217428        | rs60719098  | silent    | 0.001 | 0.003 |            | .    | .                  |
| 15  | 31217494        | .           | silent    | 0.001 | 0     |            | 0.41 | -8.26              |
| 15  | 31217979        | .           | .         | 0.001 | 0.001 |            | .    | .                  |
| 15  | 31218016        | rs144684512 | missense  | 0.001 | 0     |            | 0.22 | 4.91               |
| 15  | 31218035        | rs145610507 | missense  | 0.001 | 0.001 | damaging   | 0.02 | 5.21               |
| 15  | 31218036        | .           | silent    | 0     | 0.001 |            | 0.06 | 3.33               |
| 15  | 31218049        | .           | missense  | 0.001 | 0     |            | 0.71 | -3.61              |
| 15  | 31218057        | rs148908472 | silent    | 0.001 | 0     |            | .    | .                  |
| 15  | 31218067        | rs114441778 | missense  | 0     | 0.001 |            | 0.58 | -6.62              |
| 15  | 31218072        | rs143461130 | silent    | 0.011 | 0.003 |            | 1    | 0.505              |
| 15  | 31218180        | .           | .         | 0     | 0.001 |            | .    | .                  |
| 15  | 31220833        | .           | missense  | 0.001 | 0     | damaging   | 0    | 3.44               |
| 15  | 31220850        | rs200756403 | silent    | 0.002 | 0     |            | 0.05 | -7.96              |
| 15  | 31221358        | rs2293317   | .         | 0.004 | 0.004 |            | .    | .                  |
| 15  | 31221436        | .           | missense  | 0     | 0.001 | damaging   | 0    | 5.39               |
| 15  | 31221493        | rs80120912  | missense  | 0.026 | 0.009 |            | 0.56 | -4.95              |
| 15  | 31221498        | .           | silent    | 0     | 0.001 |            | 0.59 | -10.8              |
| 15  | 31221576        | rs142459921 | silent    | 0.001 | 0     |            | .    | .                  |
| 15  | 31221582        | .           | silent    | 0.001 | 0     |            | .    | .                  |
| 15  | 31221647        | rs112159557 | .         | 0.001 | 0.001 |            | .    | .                  |
| 15  | 31221648        | rs191666636 | .         | 0.001 | 0     |            | .    | .                  |
| 15  | 31222702        | rs79755605  | .         | 0.001 | 0     |            | .    | .                  |
| 15  | 31222763        | rs200468714 | silent    | 0.001 | 0     |            | .    | .                  |
| 15  | 31222916        | rs190074079 | .         | 0     | 0.003 |            | .    | .                  |

Table S10: LOF Variants in *FAN1*-based network. Among 27 genes in this network, there are 10 rare LOF variants in SCZ probands from the SA+US dataset. Variant annotation has been performed using SnpEff and VariantAnnotator.

| Chr | Position (hg19) | SnpEff_Impact | SnpEff_Effect     | Gene          |
|-----|-----------------|---------------|-------------------|---------------|
| 2   | 58386928        | high          | Frame_Shift       | <i>FANCL</i>  |
| 3   | 10128932        | high          | Frame_Shift       | <i>FANCD2</i> |
| 7   | 73649897        | high          | Stop_Gained       | <i>RFC2</i>   |
| 9   | 97912338        | high          | Stop_Gained       | <i>FANCC</i>  |
| 13  | 32972626        | high          | Stop_Gained       | <i>BRCA1</i>  |
| 14  | 45665741        | high          | Frame_Shift       | <i>FANCM</i>  |
| 14  | 45667921        | high          | Stop_Gained       | <i>FANCM</i>  |
| 15  | 31229463        | high          | Splice_Site_Donor | <i>FAN1</i>   |
| 16  | 89813248        | high          | Frame_Shift       | <i>FANCA</i>  |
| 17  | 41276068        | high          | Frame_Shift       | <i>BRCA1</i>  |

Table S11: Type 1 Error Assessment using simulated data. Reported in the table are empirical Type 1 error rates corresponding to  $\alpha$  levels of {0.05, 0.01, 0.001}. Region length  $L$  is {50kb, 100kb}.

| $L$<br>(kb) | $n$  | Threshold | $w$<br>(kb) | $\alpha$ |         |         |         |
|-------------|------|-----------|-------------|----------|---------|---------|---------|
|             |      |           |             | 0.05     | 0.01    | 0.001   |         |
| 50          | 100  | 0.01      | 10          | 4.9E-02  | 9.9E-03 | 9.7E-04 |         |
|             |      |           | 20          | 4.9E-02  | 1.0E-02 | 1.1E-03 |         |
|             |      |           | 30          | 4.9E-02  | 1.0E-02 | 1.0E-03 |         |
|             | 100  | 0.05      | 10          | 5.1E-02  | 1.0E-02 | 1.0E-03 |         |
|             |      |           | 20          | 4.9E-02  | 9.4E-03 | 1.0E-03 |         |
|             |      |           | 30          | 5.1E-02  | 1.0E-02 | 1.4E-03 |         |
|             | 300  | 0.01      | 0.01        | 10       | 5.0E-02 | 1.0E-02 | 1.3E-03 |
|             |      |           |             | 20       | 5.1E-02 | 9.8E-03 | 1.1E-03 |
|             |      |           |             | 30       | 4.9E-02 | 1.0E-02 | 1.1E-03 |
| 0.05        |      | 10        | 4.8E-02     | 9.9E-03  | 1.4E-03 |         |         |
|             |      | 20        | 5.1E-02     | 1.0E-02  | 1.0E-03 |         |         |
|             |      | 30        | 5.0E-02     | 9.8E-03  | 1.0E-03 |         |         |
| 500         | 0.01 | 0.01      | 10          | 4.8E-02  | 9.3E-03 | 1.1E-03 |         |
|             |      |           | 20          | 5.1E-02  | 1.0E-02 | 1.2E-03 |         |
|             |      |           | 30          | 4.9E-02  | 1.0E-02 | 8.1E-04 |         |
|             | 0.05 | 10        | 5.0E-02     | 1.0E-02  | 9.5E-04 |         |         |
|             |      | 20        | 4.9E-02     | 9.5E-03  | 8.7E-04 |         |         |
|             |      | 30        | 5.0E-02     | 1.0E-02  | 1.1E-03 |         |         |
| 100         | 100  | 0.01      | 10          | 4.9E-02  | 1.0E-02 | 1.0E-03 |         |
|             |      |           | 20          | 4.7E-02  | 9.5E-03 | 1.0E-03 |         |
|             |      |           | 30          | 4.8E-02  | 1.0E-02 | 1.0E-03 |         |
|             | 100  | 0.05      | 10          | 4.8E-02  | 8.1E-03 | 8.2E-04 |         |
|             |      |           | 20          | 4.9E-02  | 9.8E-03 | 1.1E-03 |         |
|             |      |           | 30          | 4.9E-02  | 9.3E-03 | 1.0E-03 |         |
|             | 300  | 0.01      | 0.01        | 10       | 4.9E-02 | 1.1E-02 | 1.0E-03 |
|             |      |           |             | 20       | 4.9E-02 | 1.0E-02 | 1.1E-03 |
|             |      |           |             | 30       | 4.9E-02 | 1.0E-02 | 1.0E-03 |
|             | 300  | 0.05      | 0.05        | 10       | 5.1E-02 | 1.0E-02 | 1.1E-03 |
|             |      |           |             | 20       | 5.2E-02 | 1.1E-02 | 1.3E-03 |
|             |      |           |             | 30       | 5.1E-02 | 1.0E-02 | 1.0E-03 |
| 500         | 0.01 | 0.01      | 10          | 4.9E-02  | 1.0E-02 | 1.1E-03 |         |
|             |      |           | 20          | 4.9E-02  | 1.0E-02 | 1.0E-03 |         |
|             |      |           | 30          | 4.9E-02  | 1.0E-02 | 1.0E-03 |         |
|             | 0.05 | 10        | 5.0E-02     | 1.0E-02  | 1.1E-03 |         |         |
|             |      | 20        | 5.2E-02     | 1.0E-02  | 1.1E-03 |         |         |
|             |      | 30        | 4.7E-02     | 8.0E-03  | 1.0E-03 |         |         |

Table S12: Jacard measure of overlap for two simulated disease models (strong cluster). ‘True Window Size’ refers to the median size of the true cluster in the simulations.  $w$  is the size of the scanning window.  $L$  is the length of the region.

| Model      | $L$    | True Window Size | $w$   | Overlap |
|------------|--------|------------------|-------|---------|
| Unique     | 500 Kb | 12.8 Kb          | 10 Kb | 0.55    |
|            |        |                  | 20 Kb | 0.48    |
|            |        |                  | 30 Kb | 0.36    |
|            | 1.5 Mb | 13.6 Kb          | 10 Kb | 0.51    |
|            |        |                  | 20 Kb | 0.47    |
|            |        |                  | 30 Kb | 0.35    |
|            | 3 Mb   | 14.1 Kb          | 10 Kb | 0.48    |
|            |        |                  | 20 Kb | 0.45    |
|            |        |                  | 30 Kb | 0.36    |
| Regression | 500 Kb | 12.6 Kb          | 10 Kb | 0.48    |
|            |        |                  | 20 Kb | 0.43    |
|            |        |                  | 30 Kb | 0.33    |
|            | 1.5 Mb | 13.0 Kb          | 10 Kb | 0.45    |
|            |        |                  | 20 Kb | 0.42    |
|            |        |                  | 30 Kb | 0.32    |
|            | 3 Mb   | 13.7 Kb          | 10 Kb | 0.42    |
|            |        |                  | 20 Kb | 0.42    |
|            |        |                  | 30 Kb | 0.32    |

Table S13: Jacard measure of overlap for two simulated disease models (weaker cluster). ‘True Window Size’ refers to the median size of the true cluster in the simulations.  $w$  is the size of the scanning window.  $L$  is the length of the region.

| Model      | $L$    | True Window Size | $w$   | Overlap |
|------------|--------|------------------|-------|---------|
| Unique     | 500 Kb | 24.6 Kb          | 10 Kb | 0.30    |
|            |        |                  | 20 Kb | 0.43    |
|            |        |                  | 30 Kb | 0.44    |
|            | 1.5 Mb | 24.9 Kb          | 10 Kb | 0.23    |
|            |        |                  | 20 Kb | 0.35    |
|            |        |                  | 30 Kb | 0.39    |
|            | 3 Mb   | 25.6 Kb          | 10 Kb | 0.21    |
|            |        |                  | 20 Kb | 0.33    |
|            |        |                  | 30 Kb | 0.41    |
| Regression | 500 Kb | 24.5 Kb          | 10 Kb | 0.30    |
|            |        |                  | 20 Kb | 0.42    |
|            |        |                  | 30 Kb | 0.44    |
|            | 1.5 Mb | 25.7 Kb          | 10 Kb | 0.26    |
|            |        |                  | 20 Kb | 0.37    |
|            |        |                  | 30 Kb | 0.41    |
|            | 3 Mb   | 26.0 Kb          | 10 Kb | 0.25    |
|            |        |                  | 20 Kb | 0.32    |
|            |        |                  | 30 Kb | 0.37    |
